# Supplementary material for: A strategy to identify housekeeping genes suitable for analysis in breast cancer diseases
Source: PubMed Central journal article supplement (PMC4986254; doi:10.1186/s12864-016-2946-1), 2016-08-15
Supplement: 12864_2016_2946_MOESM8_ESM.pdf [file 12864_2016_2946_MOESM8_ESM.pdf]

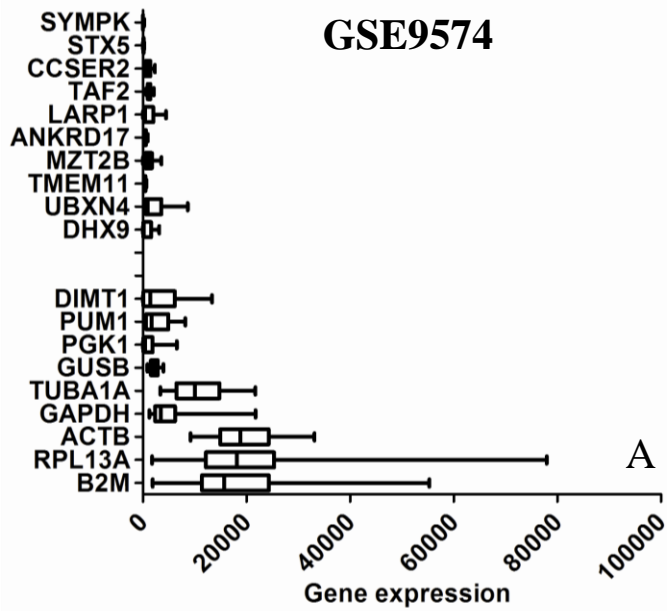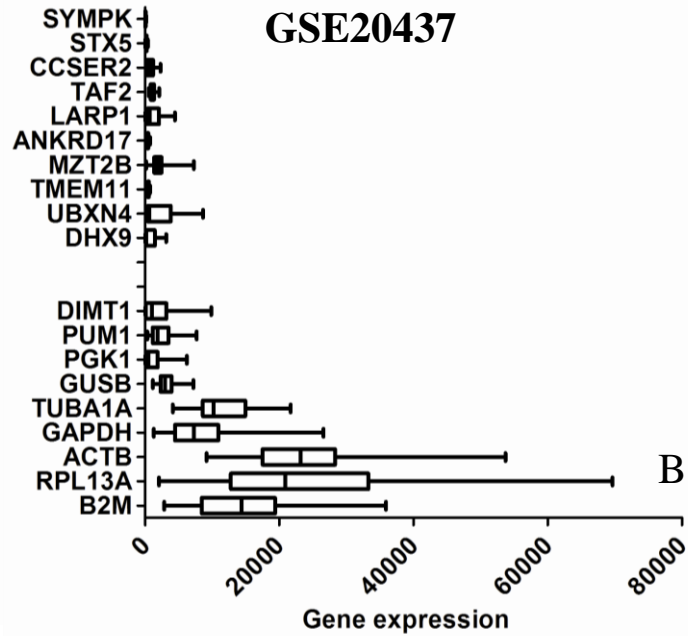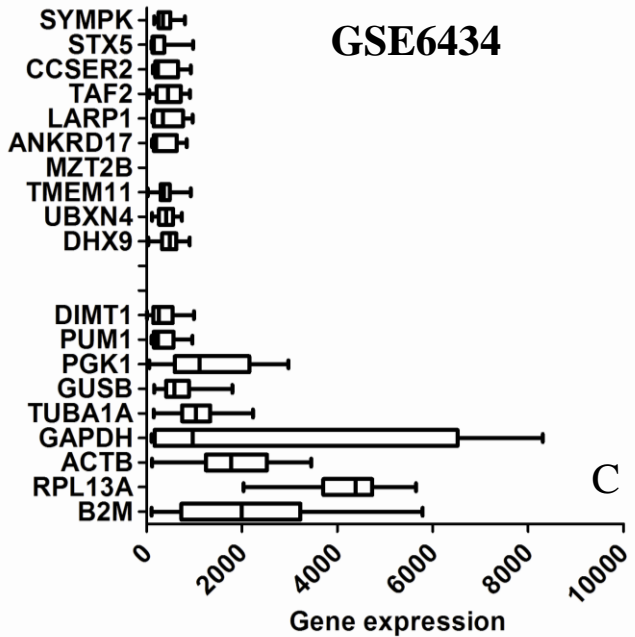

Supplementary Figure 5
